# Supplementary material for: The draft genome of Actinia tenebrosa reveals insights into toxin evolution
Source: PubMed Central journal article supplement (PMC6802032; doi:10.1002/ece3.5633), 2019-09-18

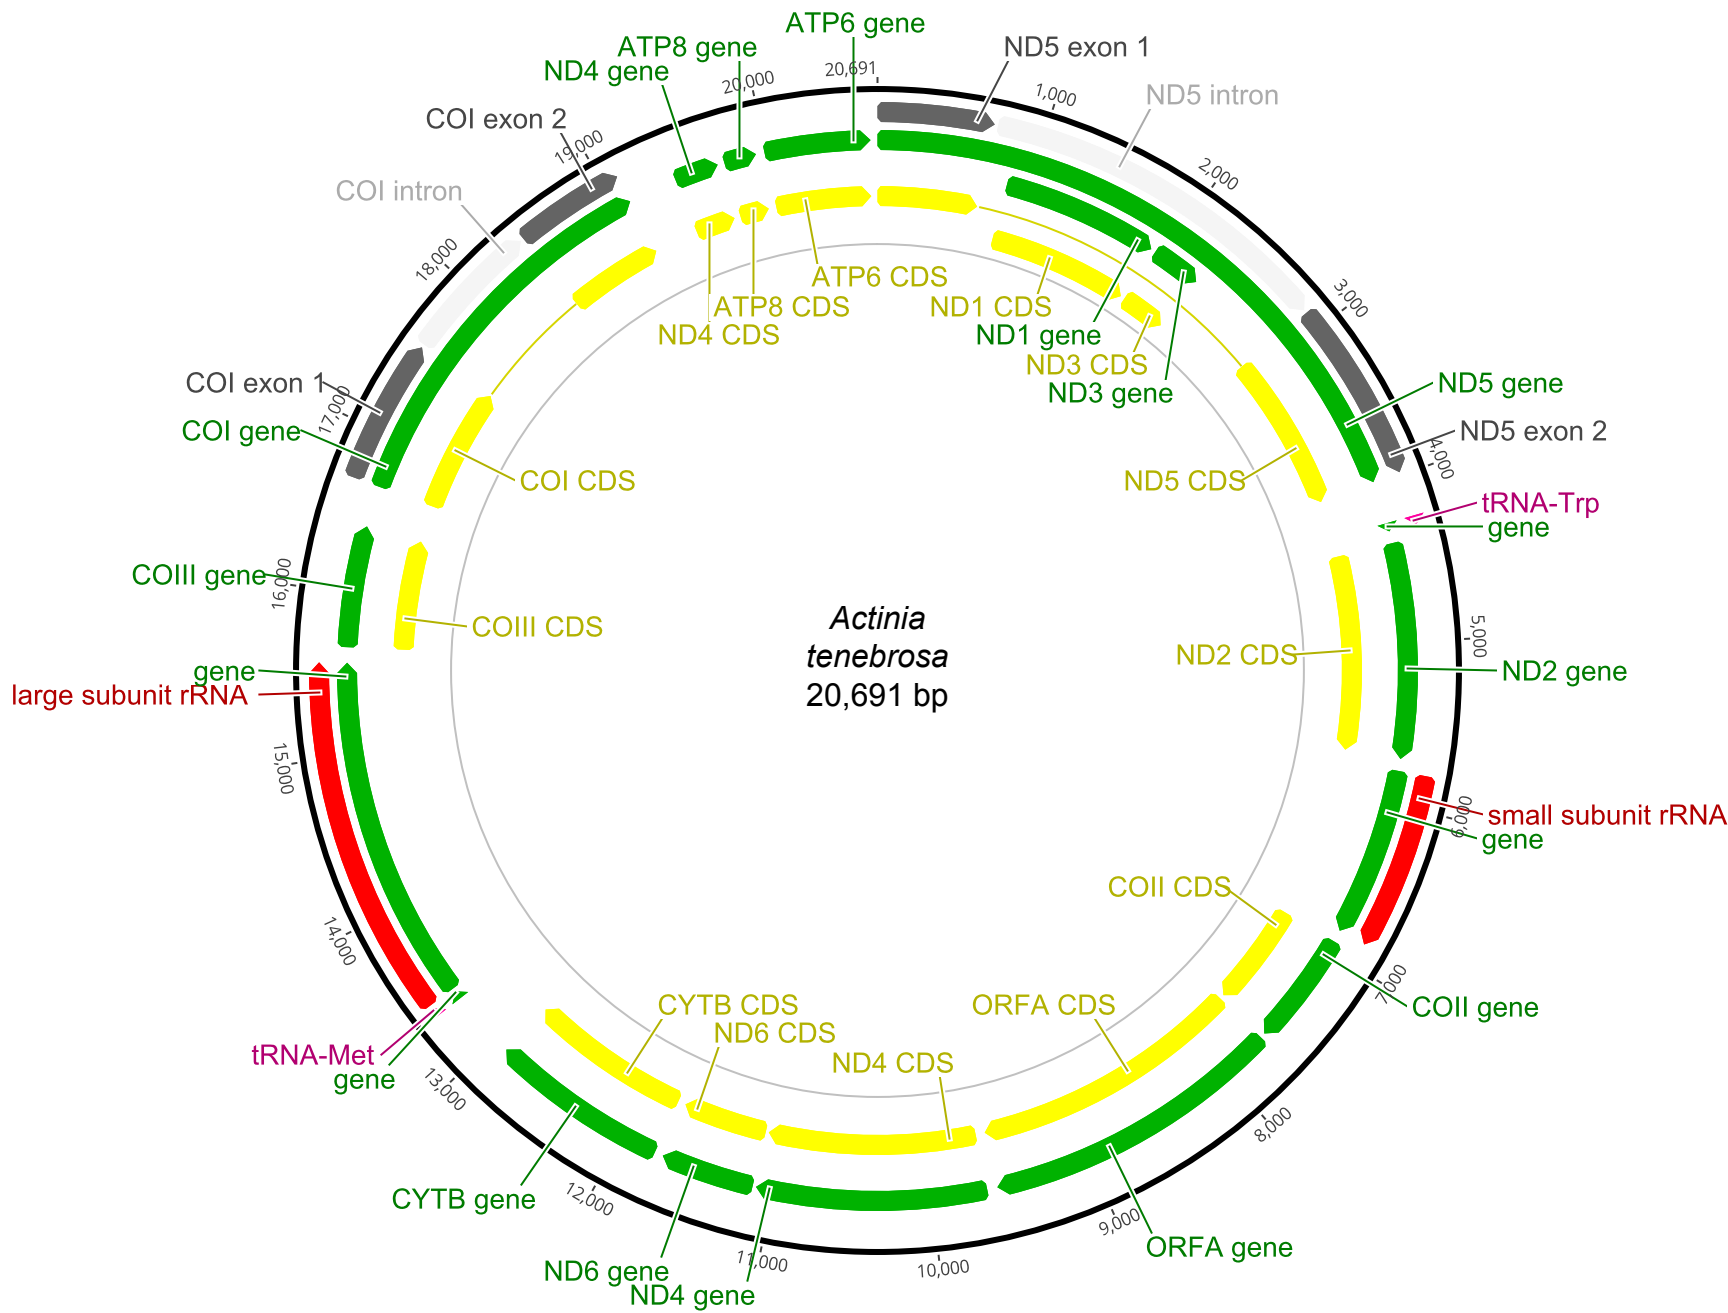

Supplement: ECE3-9-11314-s001.pdf [file ECE3-9-11314-s001.pdf]
